# Supplementary material for: Reproductive Aging in Caenorhabditis elegans: From Molecules to Ecology
Source: PubMed Central journal article supplement (PMC8481778; doi:10.3389/fcell.2021.718522), 2021-09-16
Supplement: Table_1.pdf [file Table_1.pdf]

**Supplementary Table 1.** Genetic interventions that modulate reproductive aging in *C. elegans*.

| Intervention <sup>1</sup>                               | Longitudinal experiments <sup>2</sup> /<br>Male mated <sup>3</sup> | Reproductive span to peak (days) <sup>4</sup> | Reproductive span after peak (days) <sup>5</sup> | Total reproductive span (days) <sup>6</sup> | Peak progeny number <sup>7</sup> | Total progeny number <sup>8</sup> | Matricidal hatching <sup>9</sup> | Morphological phenotypes <sup>10</sup> | Reference |                    |
|---------------------------------------------------------|--------------------------------------------------------------------|-----------------------------------------------|--------------------------------------------------|---------------------------------------------|----------------------------------|-----------------------------------|----------------------------------|----------------------------------------|-----------|--------------------|
| <b>TGF-<math>\beta</math> dauer and Sma/Mab pathway</b> | <i>daf-7</i> (e1372)                                               | yes/no                                        | +/-                                              | ↑                                           | ↑                                | ↓                                 | ND                               | ↑                                      | ND        | (Luo et al., 2009) |
|                                                         | <i>daf-1</i> (m40)                                                 | yes/no                                        | ND                                               | ND                                          | ↑                                | ND                                | ND                               | ND                                     | ND        | (Luo et al., 2009) |
|                                                         | <i>daf-14</i> (m77)                                                | yes/no                                        | +/-                                              | ↑                                           | ↑                                | ↓                                 | ND                               | ND                                     | ND        | (Luo et al., 2009) |
|                                                         | <i>daf-4</i> (e1364)                                               | yes/no                                        | ↑                                                | ↑                                           | ↑                                | ↓                                 | ↓                                | ↑                                      | ND        | (Luo et al., 2009) |
|                                                         | <i>daf-3</i> (mgDf90)                                              | yes/no                                        | +/-                                              | ↑                                           | ↑                                | ↓                                 | ND                               | ND                                     | ND        | (Luo et al., 2009) |
|                                                         | <i>sma-2</i> (e502)                                                | yes/both                                      | ↑ (only self-fertile)                            | ↑                                           | ↑ (both mated and self-fertile)  | ↓                                 | ↓                                | ↑                                      | ND        | (Luo et al., 2009) |

|  |                                  |                        |               |                                                                   |                                                    |     |     |      |    |                                                                                 |
|--|----------------------------------|------------------------|---------------|-------------------------------------------------------------------|----------------------------------------------------|-----|-----|------|----|---------------------------------------------------------------------------------|
|  | <i>sma-2</i><br>RNAi             | yes/both               | ND            | ND                                                                | ↑ (both mated<br>and self-fertile)                 | ND  | ND  | ND   | ND | (Luo et al.,<br>2009)(Luo et<br>al., 2010)                                      |
|  | <i>sma-4</i><br>( <i>e729</i> )  | yes/no                 | ND            | ↑<br>but difficult to<br>measure due to<br>matricidal<br>hatching | not determined<br>due to<br>matricidal<br>hatching | ND  | ND  | ↑    | ND | (Luo et al.,<br>2009)                                                           |
|  | <i>sma-3</i><br>( <i>wk20</i> )  | yes/both               | ND            | ND                                                                | ↑ (both mated<br>and self-fertile)                 | ND  | ND  | ↑    | ND | (Luo et al.,<br>2009)                                                           |
|  | <i>sma-3</i><br>( <i>wk28</i> )  | yes/no                 | ND            | ND                                                                | ↑                                                  | ND  | ND  | ↑    | ND | (Luo et al.,<br>2009)(Luo et<br>al., 2010)                                      |
|  | <i>sma-3</i><br>( <i>wk30</i> )  | yes/no                 | ND            | ND                                                                | ↑                                                  | ND  | ND  | ND   | ND | (Templeman<br>et al., 2020)                                                     |
|  | <i>dbl-1</i><br>( <i>nk3</i> )   | yes/both*,<br>no**,*** | +/- **or ↑*** | ↑**,***                                                           | ↑ (both mated<br>and self-fertile)                 | ↓** | ↓** | ↑*** | ND | (Luo et al.,<br>2009*; Madhu<br>et al., 2019**;<br>de Lucas et<br>al., 2021***) |
|  | <i>sma-9</i><br>( <i>wk55</i> )  | yes/yes                | +/-           | ↑                                                                 | ↑                                                  | ↓   | ↓   | ↑    | ND | (Luo et al.,<br>2009)                                                           |
|  | <i>sma-9</i><br>( <i>qc3</i> )   | yes/yes                | ↑             | ↑                                                                 | ↑                                                  | ND  | ↓   | ND   | ND | (Luo et al.,<br>2009)                                                           |
|  | <i>crh-1</i><br>( <i>n3450</i> ) | yes/yes                | ND            | ND                                                                | ↑                                                  | ND  | ND  | ND   | ND | (Templeman<br>et al., 2020)                                                     |

|                                        |                                            |              |     |    |     |     |     |    |                                                               |                          |
|----------------------------------------|--------------------------------------------|--------------|-----|----|-----|-----|-----|----|---------------------------------------------------------------|--------------------------|
|                                        | <i>crh-1</i><br>(n3315)                    | yes/yes      | ND  | ↑  | ↑   | ND  | ND  | ND | significant improvement<br>in the morphology of aging oocytes | (Templeman et al., 2020) |
|                                        | <i>sma-10</i><br>(ok2224)                  | yes/no       | +/- | ↑  | ↑   | ↓   | ↓   | ↓  | ND                                                            | (de Lucas et al., 2021)  |
| <b>Hedgehog related</b>                | <i>wrt-10</i> over expression (hypodermis) | yes/yes      | ND  | ND | ↑   | ND  | ND  | ND | delay of oocyte quality deterioration                         | (Templeman et al., 2020) |
| <b>Insulin/IGF-1 signaling pathway</b> | <i>age-1</i> (hx546)                       | yes/yes day1 | +/- | ND | +/- | ↓   | ↓   | ND | ND                                                            | (Hughes et al., 2007)    |
|                                        | <i>daf-2</i> (e1370)                       | yes/yes day1 | +/- | ND | +/- | ↓   | ↓   | ND | ND                                                            | (Hughes et al., 2007)    |
|                                        | <i>daf-2</i> (m41)                         | yes/yes day1 | +/- | ND | ↓   | ↓   | ↓   | ND | ND                                                            | (Hughes et al., 2007)    |
|                                        | <i>daf-2</i> (RNAi)                        | yes/no       | +/- | ↑  | ↑   | +/- | ND  | ND | ND                                                            | (Wang et al., 2014)      |
|                                        | <i>daf-16</i> (mu86): <i>daf-2</i> (e1370) | yes/yes day1 | +/- | ND | ↑   | +/- | +/- | ND | ND                                                            | (Hughes et al., 2007)    |

|                            |                     |              |     |    |                                |     |     |    |    |                       |
|----------------------------|---------------------|--------------|-----|----|--------------------------------|-----|-----|----|----|-----------------------|
|                            | <i>daf-16(mu86)</i> | yes/yes day1 | +/- | ND | +/-                            | +/- | ↓   | ND | ND | (Hughes et al., 2007) |
|                            | <i>daf-16(m26)</i>  | yes/yes day1 | +/- | ND | +/-                            | +/- | ↓   | ND | ND | (Hughes et al., 2007) |
|                            | <i>sucg-1</i>       | yes/no       | ND  | ND | ↑                              | ND  | ND  | ND | ND | (Wang et al., 2014)   |
|                            | F36F2.2             | yes/no       | ND  | ND | ↑                              | ND  | +/- | ND | ND | (Wang et al., 2014)   |
|                            | <i>nhr-85</i>       | yes/no       | ND  | ND | ↑                              | ND  | ND  | ND | ND | (Wang et al., 2014)   |
| <b>Sodium homeostasis</b>  | <i>nhx-2</i> (RNAi) | yes/no       | +/- | ↑  | ↑                              | ↓   | ND  | ND | ND | (Wang et al., 2014)   |
|                            | <i>sgk-1</i> (RNAi) | yes/no       | ↑   | ↑  | ↑                              | ↓   | ND  | ND | ND | (Wang et al., 2014)   |
| <b>Dietary restriction</b> | <i>eat-2(ad465)</i> | yes/yes day1 | +/- | ↑  | ↑                              | ↓   | ↓   | ↓  | ND | (Hughes et al., 2007) |
|                            | <i>eat-2(ad465)</i> | yes/both     | ↑   | ↑  | ↑(both mated and self-fertile) | ↓   | ↓   | ↑  | ND | (Luo et al., 2009)    |
|                            | <i>eat-2</i> (RNAi) | yes/both     | ↑   | ↑  | ↑(both mated and self-fertile) | ↓   | ↓   | ↑  | ND | (Luo et al., 2009)    |

|                                |                      |              |     |     |     |    |    |    |    |                                           |
|--------------------------------|----------------------|--------------|-----|-----|-----|----|----|----|----|-------------------------------------------|
|                                | <i>eat-2(ad1116)</i> | yes/no       | ↑   | ↑   | ↑   | ↓  | ↓  | ND | ND | (Crawford et al., 2007)                   |
|                                | <i>phm-2(am117)</i>  | yes/yes      | ↑   | ↑   | ↑   | ↓  | ↓  | ↑  | ND | (Hughes et al., 2011; Kumar et al., 2019) |
| <b>unc-25 (GABA synthesis)</b> | <i>unc-25(e156)</i>  | yes/no       | ↑   | ↑   | ↑   | ↓  | ↓  | ND | ND | (Cermak et al., 2020)                     |
|                                | <i>unc-25(n2324)</i> | yes/no       | ↑   | ↑   | ↑   | ↓  | ↓  | ND | ND | (Cermak et al., 2020)                     |
| <b>Mitochondrial genes</b>     | <i>clk-1(qm30)</i>   | yes/yes day1 | ↑   | ND  | +/- | ↓  | ↓  | ND | ND | (Hughes et al., 2007)                     |
|                                | <i>isp-1(qm150)</i>  | yes/yes day1 | ↑   | ND  | +/- | ↓  | ↓  | ND | ND | (Hughes et al., 2007)                     |
| <i>dhcr-24</i> (F52H2.6 RNAi)  |                      | yes/no       | +/- | +/- | +/- | ↑  | ↑  | ND | ND | (Kim et al., 2018)                        |
| <i>moma-1</i> (RNAi)           |                      | yes/no       | ND  | ND  | ↑   | ND | ND | ND | ND | (Wang et al., 2014)                       |
| F37C4.8 (RNAi)                 |                      | yes/no       | ND  | ND  | ↑   | ND | ND | ND | ND | (Wang et al., 2014)                       |
| Y38H6C.21 (RNAi)               |                      | yes/no       | ND  | ND  | ↑   | ND | ND | ND | ND | (Wang et al., 2014)                       |

|                         |        |    |    |   |    |     |    |    |                     |
|-------------------------|--------|----|----|---|----|-----|----|----|---------------------|
| R07H5.9 (RNAi)          | yes/no | ND | ND | ↑ | ND | ND  | ND | ND | (Wang et al., 2014) |
| VC27A7L.1 (RNAi)        | yes/no | ND | ND | ↑ | ND | ND  | ND | ND | (Wang et al., 2014) |
| <i>ilys-3</i> (RNAi)    | yes/no | ND | ND | ↑ | ND | ↓   | ND | ND | (Wang et al., 2014) |
| <i>suc1-2</i> (RNAi)    | yes/no | ↑  | ↑  | ↑ | ↓  | ND  | ND | ND | (Wang et al., 2014) |
| <i>oac-16</i><br>(RNAi) | yes/no | ND | ND | ↑ | ND | ND  | ND | ND | (Wang et al., 2014) |
| <i>adal-1</i><br>(RNAi) | yes/no | ND | ND | ↑ | ND | +/- | ND | ND | (Wang et al., 2014) |
| F25H8.1<br>(RNAi)       | yes/no | ND | ND | ↑ | ND | +/- | ND | ND | (Wang et al., 2014) |
| <i>daf-3</i><br>(RNAi)  | yes/no | ND | ND | ↑ | ND | +/- | ND | ND | (Wang et al., 2014) |
| <i>rskn-1</i><br>(RNAi) | yes/no | ND | ND | ↑ | ND | ND  | ND | ND | (Wang et al., 2014) |

|                         |        |    |    |   |    |     |     |    |                     |
|-------------------------|--------|----|----|---|----|-----|-----|----|---------------------|
| <i>igdb-2</i><br>(RNAi) | yes/no | ND | ND | ↑ | ND | ND  | ND  | ND | (Wang et al., 2014) |
| F20B10.3<br>(RNAi)      | yes/no | ND | ND | ↑ | ND | +/- | ND  | ND | (Wang et al., 2014) |
| T04B2.1<br>(RNAi)       | yes/no | ND | ND | ↑ | ND | +/- | +/- | ND | (Wang et al., 2014) |
| Y58A7A.1<br>(RNAi)      | yes/no | ND | ND | ↑ | ND | ND  | ND  | ND | (Wang et al., 2014) |
| <i>cox-18</i><br>(RNAi) | yes/no | ND | ND | ↑ | ND | ND  | ND  | ND | (Wang et al., 2014) |
| F54E2.1 (RNAi)          | yes/no | ND | ND | ↑ | ND | ND  | ND  | ND | (Wang et al., 2014) |
| <i>hmr-1</i> (RNAi)     | yes/no | ND | ND | ↑ | ND | ND  | ND  | ND | (Wang et al., 2014) |
| <i>unk-1</i><br>(RNAi)  | yes/no | ND | ND | ↑ | ND | ND  | ND  | ND | (Wang et al., 2014) |

<sup>1</sup>Intervention: gene with mutant allele or RNAi.

<sup>2</sup>Longitudinal experiment: the same individual animal is observed at sequential time points. yes: measured in a longitudinal experiment, no: measured in a cross-sectional experiment.

<sup>3</sup>Male mated: yes- hermaphrodites were exposed to males, with adult day of exposure specified, no: self-fertile hermaphrodites.

<sup>4</sup>Reproductive span to peak: time from adult day 0 until day of peak egg-laying (Figure 1).

<sup>5</sup>Reproductive span after peak: time from day of peak egg-laying until last day of egg-laying (Figure 1).

<sup>6</sup>Total reproductive span: time from adult day 0 until last day of egg-laying (Figure 1).

<sup>7</sup>Peak progeny number: Number of eggs laid on day of peak progeny production (Figure 1).

<sup>8</sup>Total progeny number: Total number of eggs laid (Figure 1).

<sup>9</sup>Matricidal hatching: If mature hermaphrodites cannot deposit eggs into the environment, then eggs hatch inside the hermaphrodite, and larvae feed on the parent resulting in death.

<sup>10</sup>Morphological phenotypes: interventions may affect age-related changes in gonad morphology.

<sup>4-9</sup>↑: increase; ↓: decrease; +/-: no change; ND: not determined.

## Literature

Cermak, N., Yu, S. K., Clark, R., Huang, Y. C., Baskoylu, S. N., and Flavell, S. W. (2020). Whole-organism behavioral profiling reveals a role for dopamine in statedependent motor program coupling in *C. Elegans*. *Elife* 9, 1–34. doi:10.7554/eLife.57093.

Crawford, D., Libina, N., and Kenyon, C. (2007). *Caenorhabditis elegans* integrates food and reproductive signals in lifespan determination. *Aging Cell* 6, 715–721. doi:10.1111/j.1474-9726.2007.00327.x.

de Lucas, M. P., Jiménez, M., Sánchez-Pavón, P., Sáez, A. G., and Lozano, E. (2021). SMA-10 is a non-canonical member of the TGF- $\beta$  sma/mab pathway and immunity regulator via the DAF-2 insulin receptor in *caenorhabditis elegans*. *Int. J. Mol. Sci.* 22, 1–13. doi:10.3390/ijms22020638.

Hughes, S. E., Evason, K., Xiong, C., and Kornfeld, K. (2007). Genetic and pharmacological factors that influence reproductive aging in nematodes. *PLoS Genet.* 3, 0254–0265. doi:10.1371/journal.pgen.0030025.

Hughes, S. E., Huang, C., and Kornfeld, K. (2011). Identification of mutations that delay somatic or reproductive aging of *Caenorhabditis elegans*. *Genetics* 189, 341–356. doi:10.1534/genetics.111.130450.

Kim, Y., Park, Y., Hwang, J., and Kwack, K. (2018). Comparative genomic analysis of the human and nematode *caenorhabditis elegans* uncovers potential reproductive genes and disease associations in humans. *Physiol. Genomics* 50, 1002–1014. doi:10.1152/physiolgenomics.00063.2018.

Kumar, S., Egan, B. M., Kocsisova, Z., Schneider, D. L., Murphy, J. T., Diwan, A., et al. (2019). Lifespan Extension in *C. elegans*



Caused by Bacterial Colonization of the Intestine and Subsequent Activation of an Innate Immune Response. *Dev. Cell* 49, 100-117.e6. doi:10.1016/j.devcel.2019.03.010.

Luo, S., Kleemann, G. A., Ashraf, J. M., Shaw, W. M., and Murphy, C. T. (2010). TGF- $\beta$  and Insulin Signaling Regulate Reproductive Aging via Oocyte and Germline Quality Maintenance. *Cell* 143, 299–312. doi:10.1016/j.cell.2010.09.013.

Luo, S., Shaw, W. M., Ashraf, J., and Murphy, C. T. (2009). TGF- $\beta$  Sma/Mab Signaling Mutations Uncouple Reproductive Aging from Somatic Aging. *PLoS Genet.* 5, e1000789. doi:10.1371/journal.pgen.1000789.

Madhu, B., Salazar, A., and Gumienny, T. (2019). *Caenorhabditis elegans* egg-laying and brood-size changes upon exposure to *Serratia marcescens* and *Staphylococcus epidermidis* are independent of DBL-1 signaling. *microPublication Biol.* 2019. doi:10.17912/2r51-b476.

Templeman, N. M., Cota, V., Keyes, W., Kaletsky, R., and Murphy, C. T. (2020). CREB Non-autonomously Controls Reproductive Aging through Hedgehog/Patched Signaling. *Dev. Cell* 54, 92-105.e5. doi:10.1016/j.devcel.2020.05.023.

Wang, M. C., Oakley, H. D., Carr, C. E., Sowa, J. N., and Ruvkun, G. (2014). Gene Pathways That Delay *Caenorhabditis elegans* Reproductive Senescence. *PLoS Genet.* 10, e1004752. doi:10.1371/journal.pgen.1004752.
